# Supplementary material for: Experimental and theoretical investigations of cyclometalated ruthenium(ii) complex containing CCC-pincer and anti-inflammatory drugs as ligands: synthesis, characterization, inhibition of cyclooxygenase andin vitrocytotoxicity activities in various cancer cell lines
Source: Royal Society of Chemistry journal article supplement (doi:10.1039/c8dt03266a), 2018-12-03
Supplement: c8dt03266a1.pdf [file c8dt03266a1.pdf]

## Supporting Information

**Experimental and theoretical investigations of cyclometalated ruthenium(II) complex containing CCC-pincer and anti-inflammatory drugs as ligands: synthesis, characterization, inhibition of cyclooxygenase and in vitro cytotoxicity activities on cancer cell lines**

Leila Tabrizi <sup>1\*†</sup>, Lukman O. Olasunkanmi <sup>2,3\*†</sup>, Olatomide A. Fadare <sup>2</sup>

<sup>1</sup> School of Chemistry, National University of Ireland, Galway, University Road, Galway, Ireland

<sup>2</sup> Department of Chemistry, Faculty of Science, Obafemi Awolowo University, Ile-Ife 220005, Nigeria.

<sup>3</sup> Material Science Innovation and Modelling (MaSIM) Research Focus Area, Faculty of Natural and Agricultural Sciences, North-West University (Mafikeng Campus), Private Bag X2046, Mmabatho, South Africa

Corresponding author: Leila Tabrizi; Email: [LEILA.TABRIZI@nuigalway.ie](mailto:LEILA.TABRIZI@nuigalway.ie)

Corresponding author: Lukman O. Olasunkanmi; Email: [waleolasunkanmi@gmail.com](mailto:waleolasunkanmi@gmail.com)

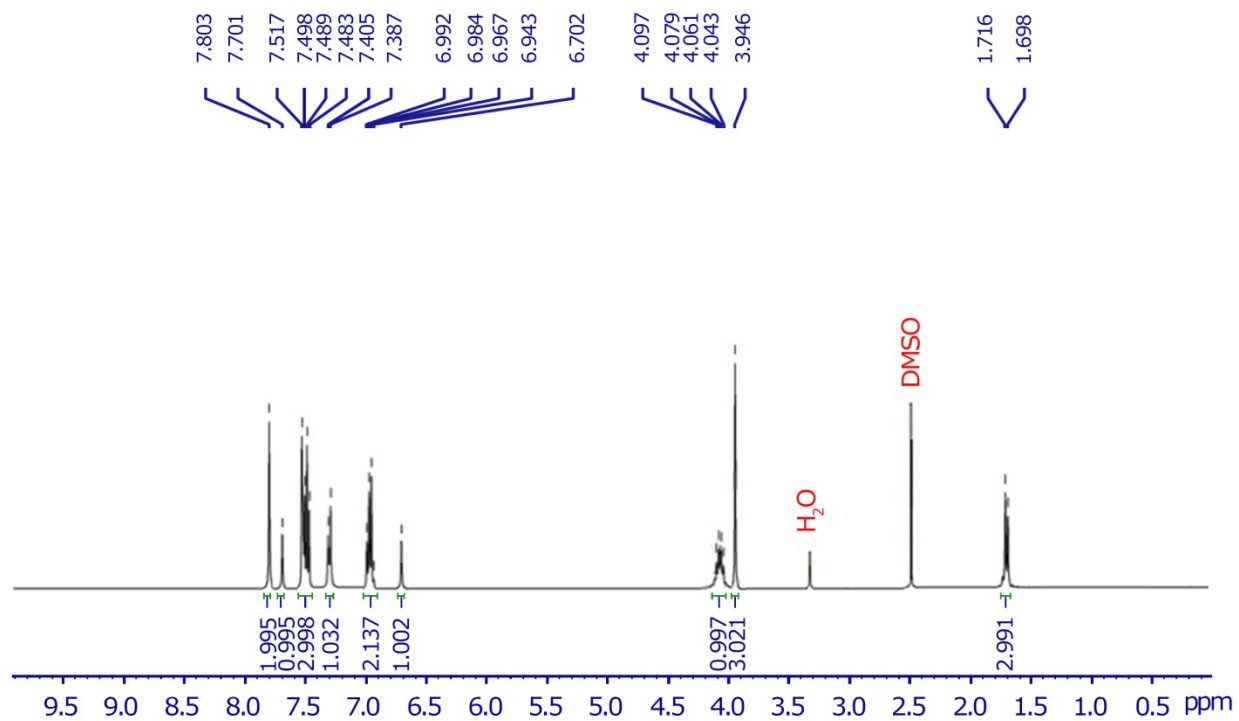

**Figure S1.** <sup>1</sup>H NMR spectrum of ligand **1** (DMSO-*d*<sub>6</sub>).

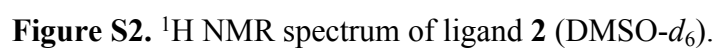

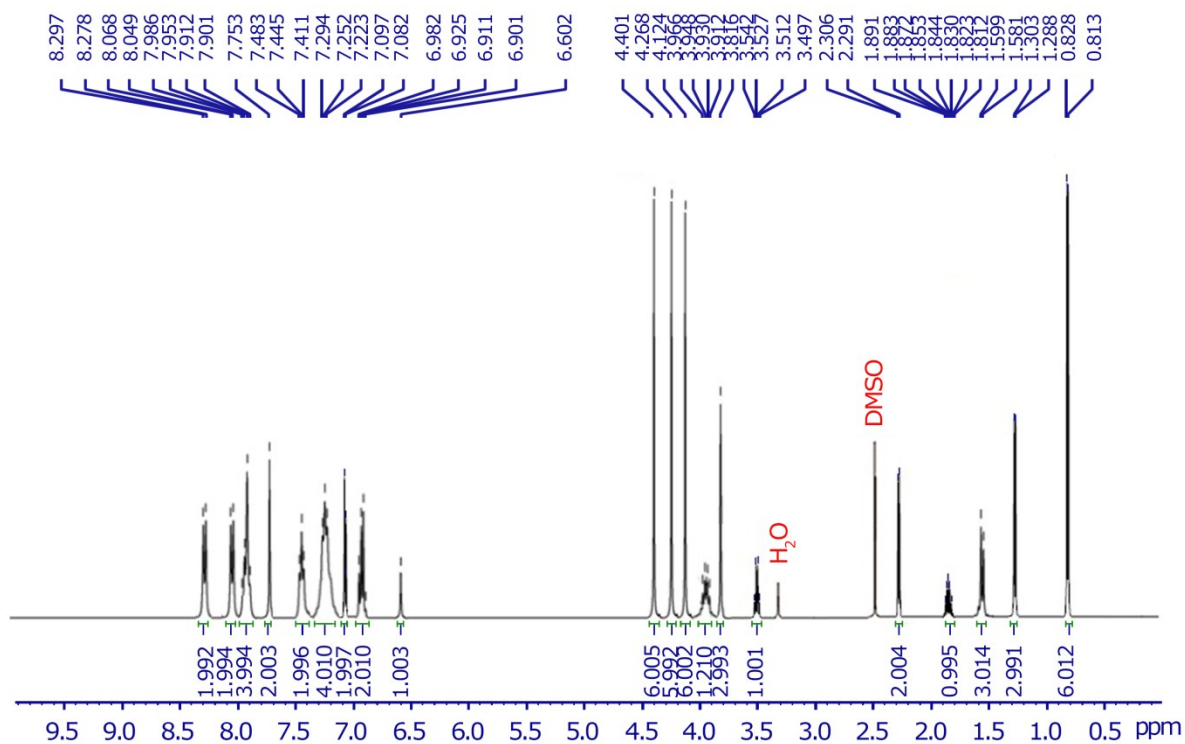

**Figure S3.**  $^1\text{H}$  NMR spectrum of complex **3** ( $\text{DMSO-}d_6$ ).

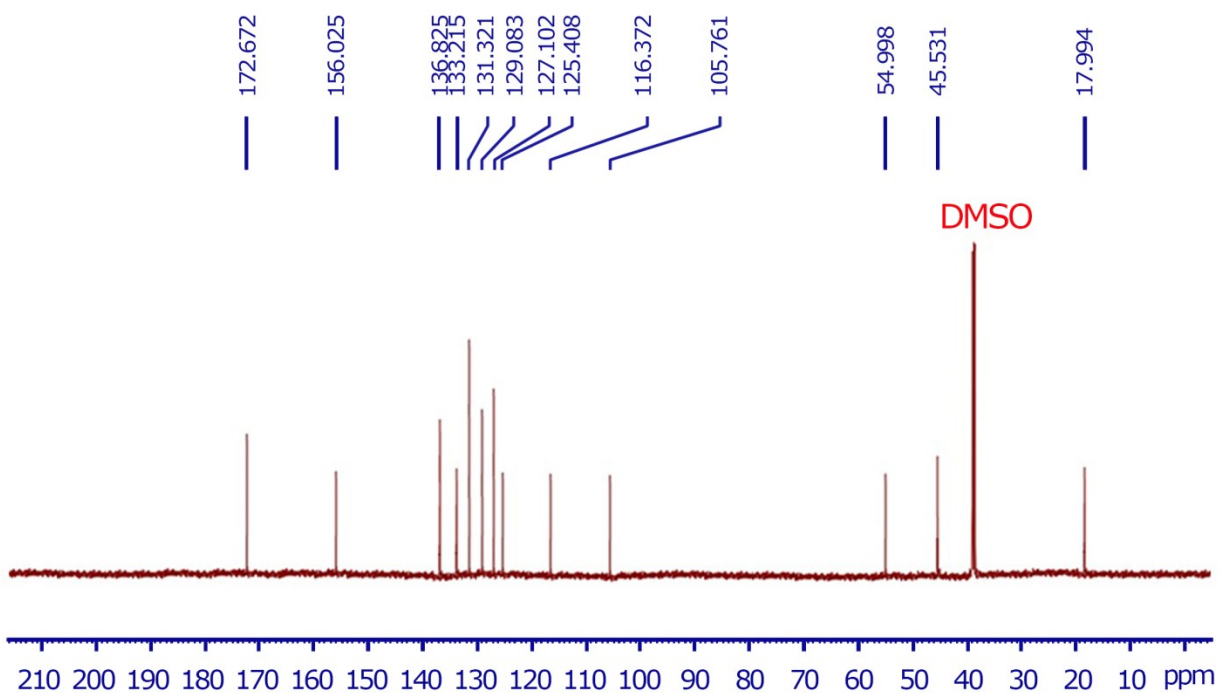

**Figure S4.** <sup>13</sup>C NMR spectrum of ligand **1** (DMSO-*d*<sub>6</sub>).

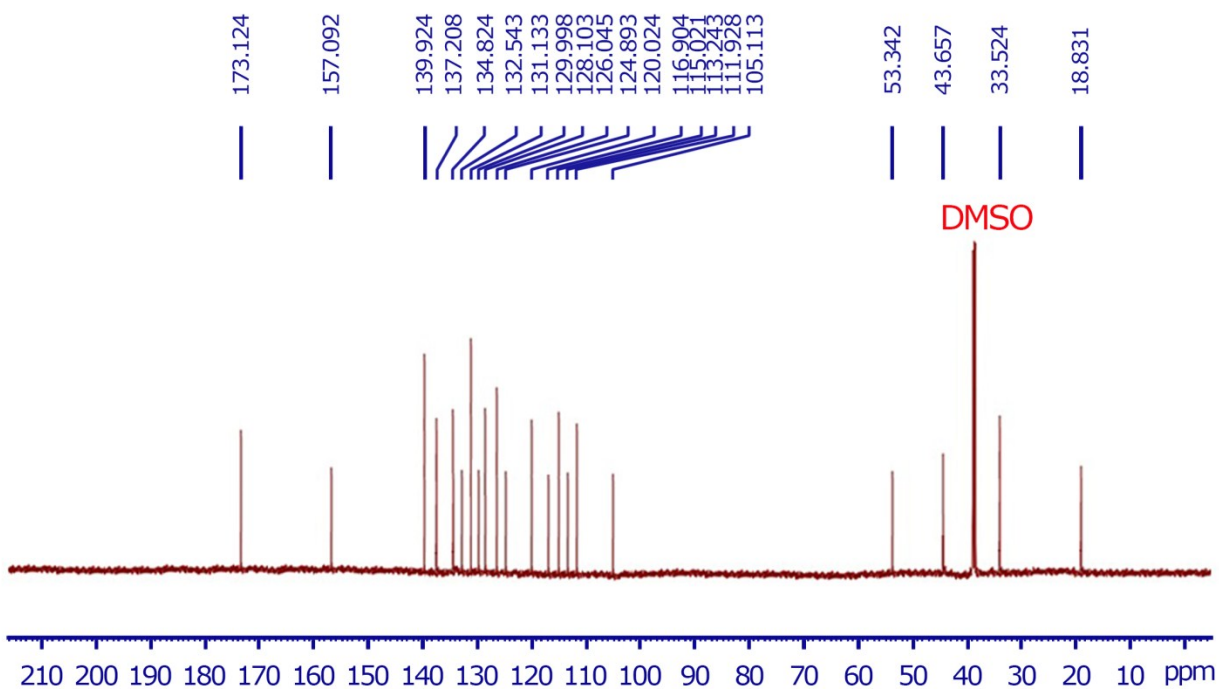

**Figure S5.**  $^{13}\text{C}$  NMR spectrum of ligand **2** ( $\text{DMSO}-d_6$ ).

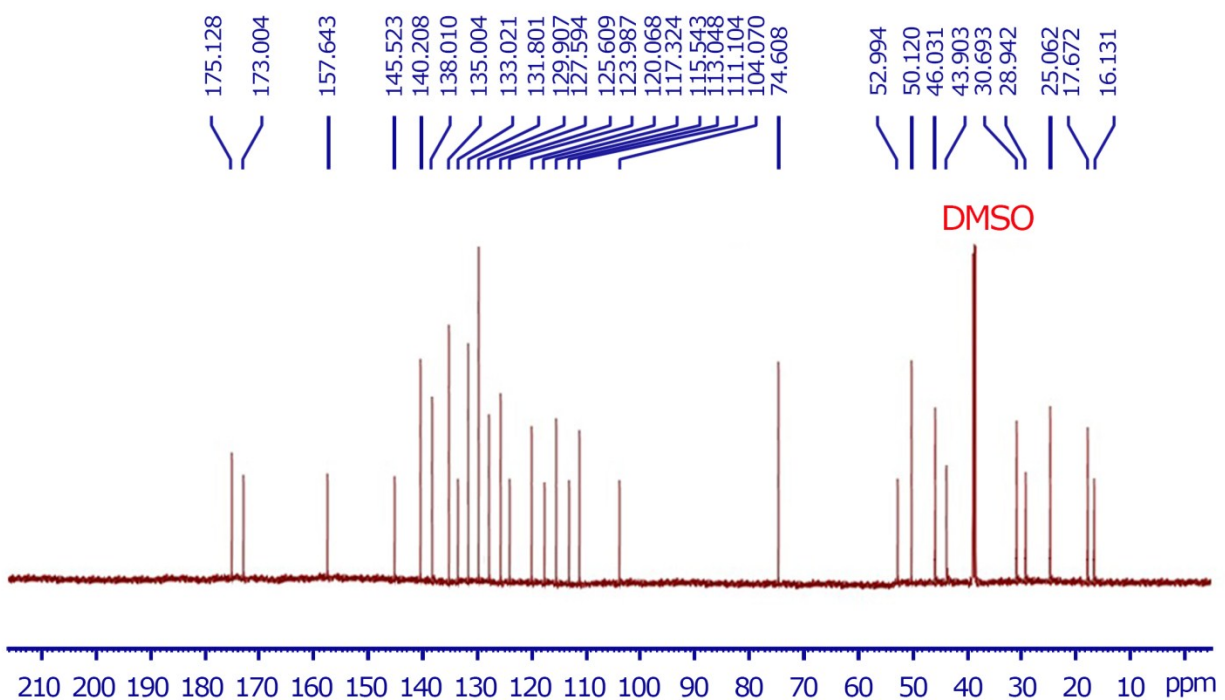

**Figure S6.**  $^{13}\text{C}$  NMR spectrum of complex **3** ( $\text{DMSO-}d_6$ ).

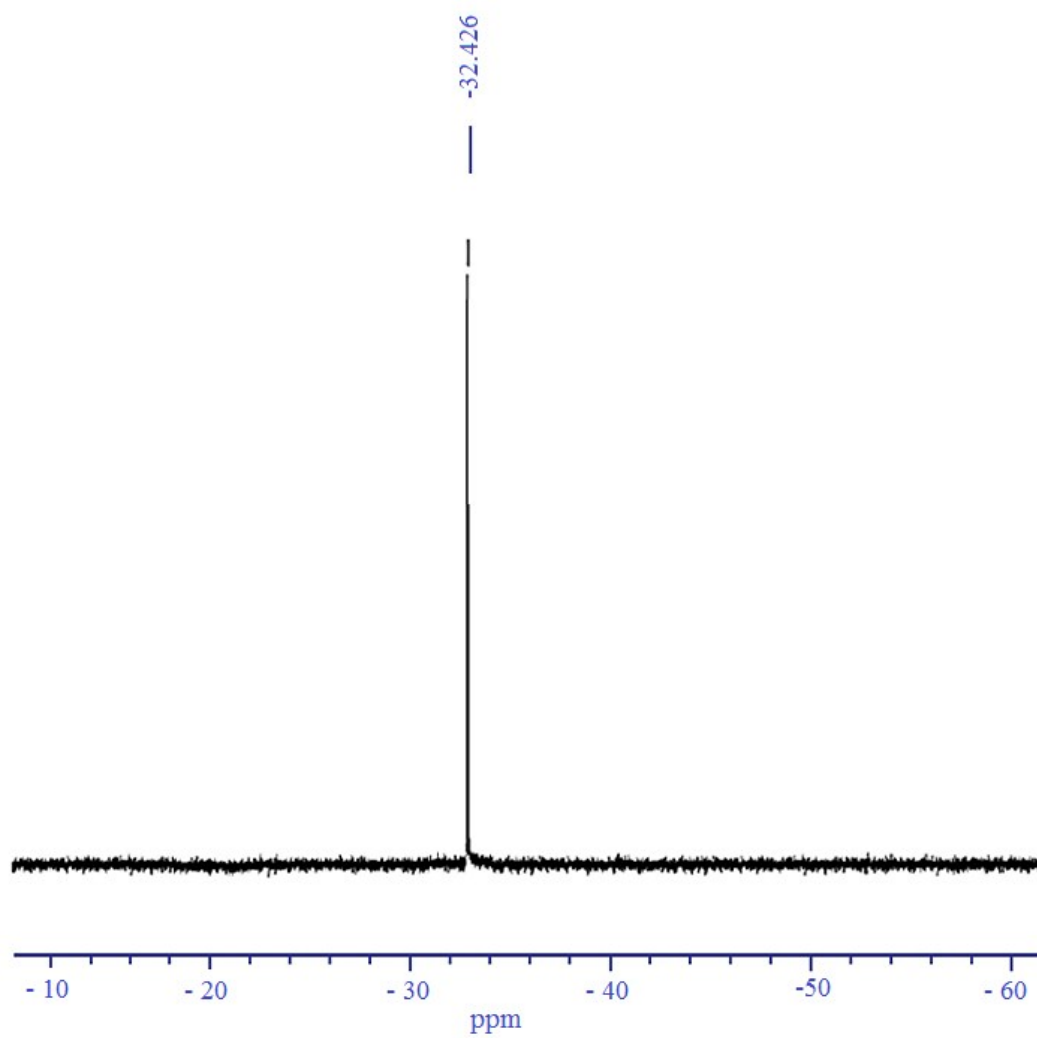

**Figure S7.**  $^{31}\text{P}$  NMR spectrum of complex **3** ( $\text{DMSO-}d_6$ ).



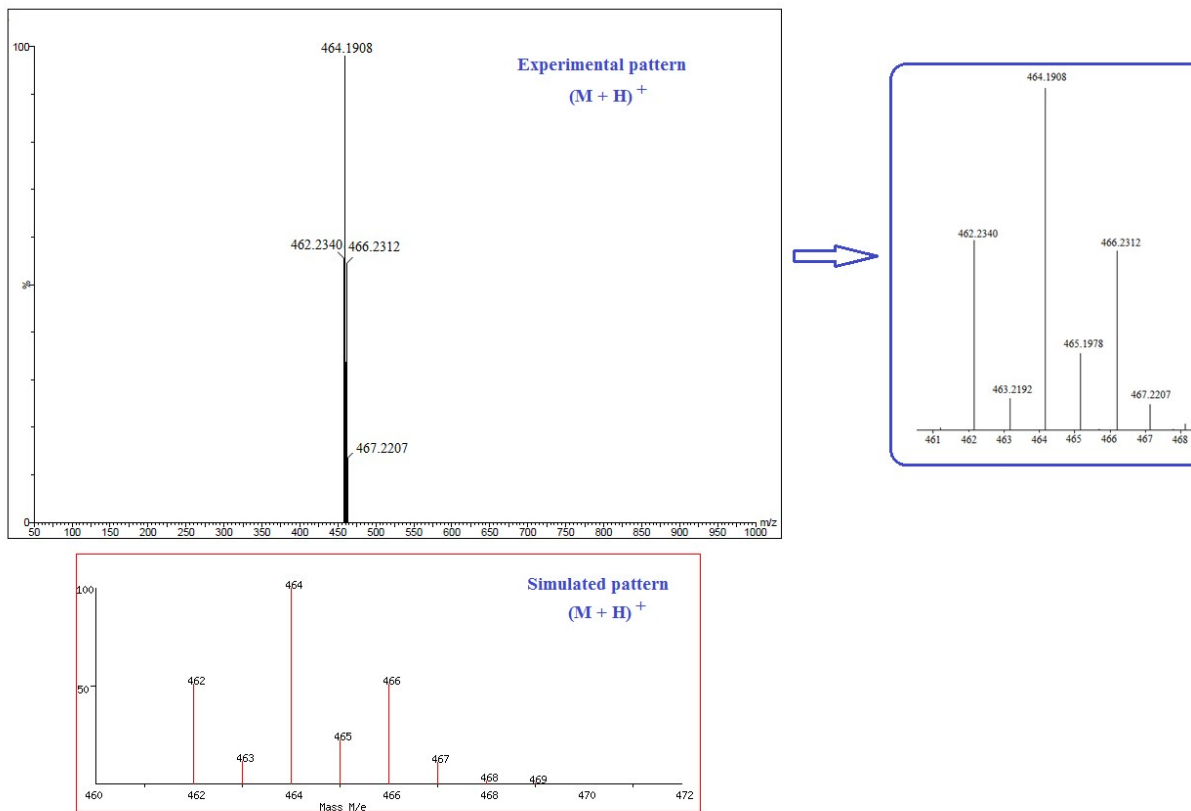

**Figure S8.** TOF MS spectrum of ligand 1.

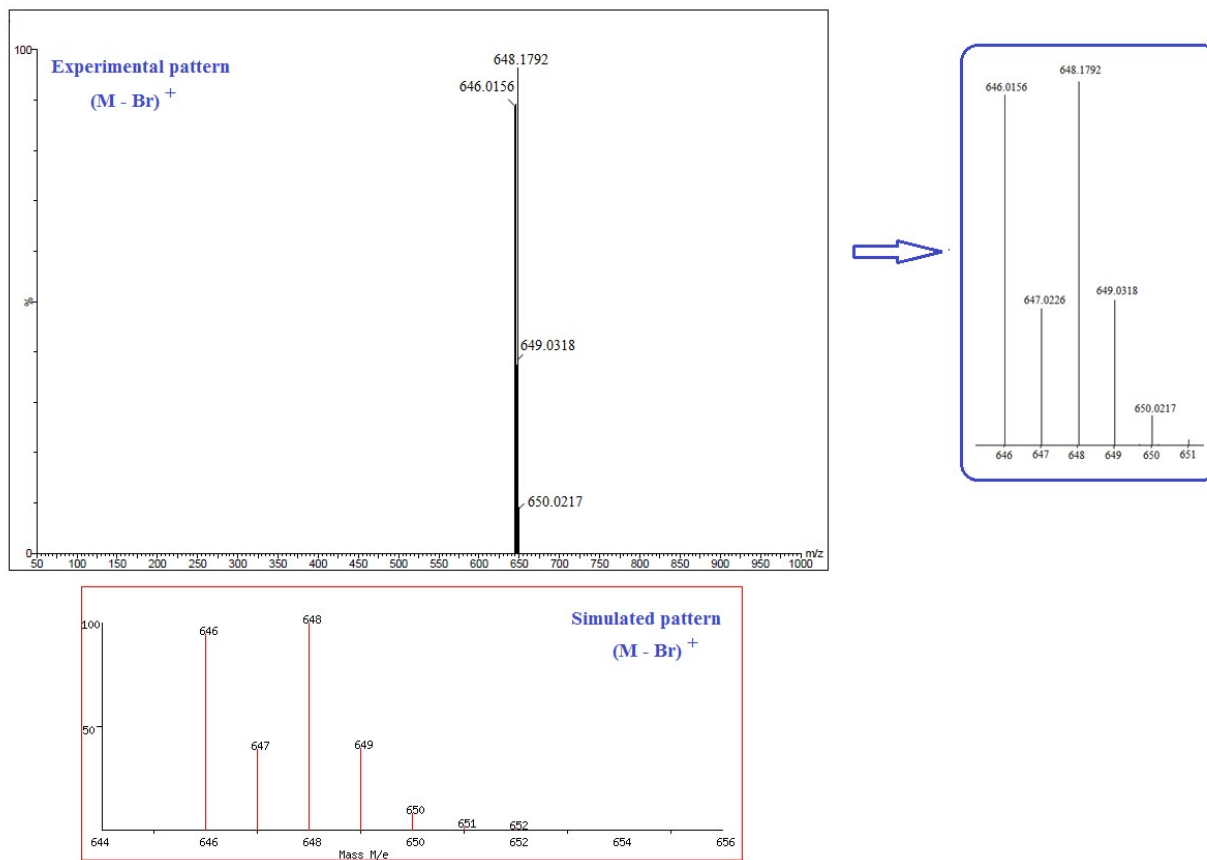

**Figure S9.** TOF MS spectrum of ligand 2.

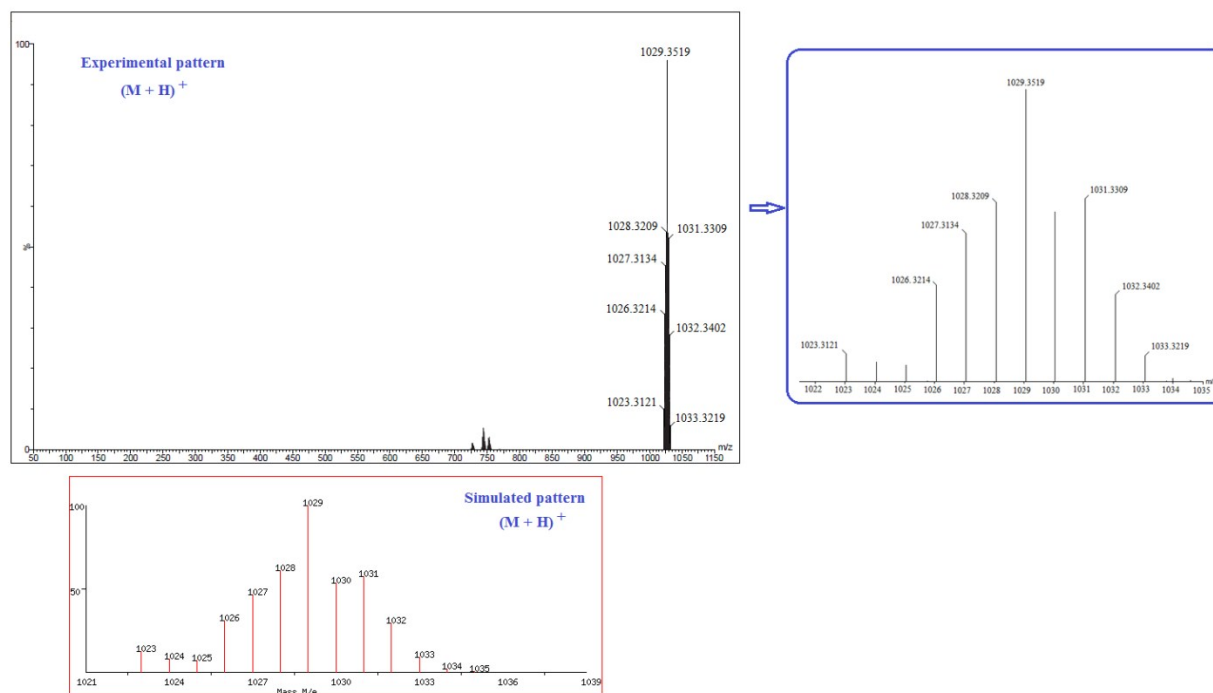

**Figure S10.** TOF MS spectrum of complex **3**.

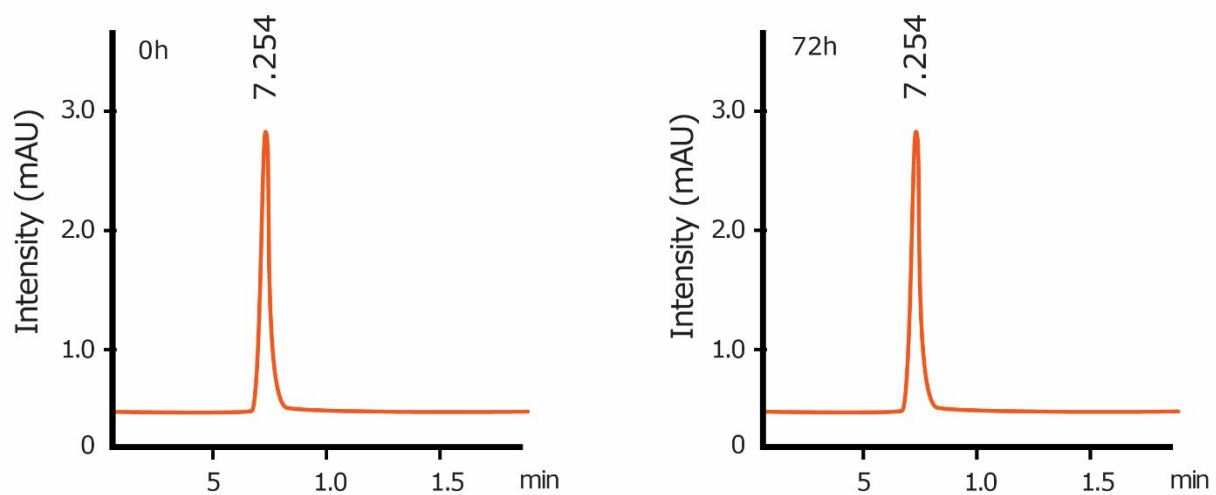

**Figure S11.** HPLC chromatogram of the complex **3** in PBS/DMSO (1%) solution before (0h) and after incubation time (72h) at 37 °C.
